# Supplementary material
Source: PubMed Central journal article supplement (PMC7492401)

# R\_Notebook\_ibrutinib\_swath.Rmd

Code ▾

*Somchai Chutipongtanate*

January 11, 2020

This is an R Markdown (<http://rmarkdown.rstudio.com>) Notebook version of `ibrutinib_swath.R`. In R Notebook, you can execute the code chunk by clicking the run button on the upper right corner of each chunk. The results will then appear beneath the code.

To use this script, please download and install R (version 3.4.4 or later) and RStudio (version 1.1.453 or later).

Once R and Rstudio installations finish, please open the file "R\_Notebook\_ibrutinib\_swath.Rmd". Since this script needs functions from several R packages, the first step is to install all package dependencies below. This step can be skipped if all required packages (as shown below) have already been installed.

Hide

```
# Install package dependencies
install.packages(c("readxl", "dplyr", "tidyr", "ggplot2", "ggrepel", "reshape2", "
FactoMineR", "pheatmap"))
source("https://bioconductor.org/biocLite.R")
biocLite(c("biomaRt", "preprocessCore"))
```

Then, we load the required R packages.

Hide

```
# Load: R packages
library(readxl)
library(dplyr)
library(tidyr)
library(biomaRt)
library(preprocessCore)
library(ggplot2)
library(ggrepel)
library(reshape2)
library(FactoMineR)
library(pheatmap)
```

## Data loading

The raw data (`ibrutinib_SWATH.xlsx`) is available via ProteomeXchange (PXD013402) and also downloadable as the supplementary dataset 1 once this dataset published. Please download and place the dataset file on the desktop, so that it can be loaded into R.

Hide

```
# Load: ibrutinib-SWATH dataset (PXD013402)
setwd("~/Desktop")
data_path <- "~/Desktop/ibrutinib_SWATH.xlsx"
# Start: Data preprocess -----
-----
## loading
group <- as.factor(c("WT", "WT", "WT", "WT+inh", "WT+inh", "WT+inh", "Q741x", "Q74
1x", "Q741x", "Q741x+inh", "Q741x+inh", "Q741x+inh"))
#group <- as.factor(c("W", "W", "W", "iW", "iW", "iW", "Q", "Q", "Q", "iQ", "iQ",
"iQ"))
group <- factor(group, ordered = TRUE,
               levels = c("Q741x+inh", "WT+inh", "Q741x", "WT"))
sample_label <- as.character(c("WT_1", "WT_2", "WT_3", "WT+inh_1", "WT+inh_2", "WT
+inh_3", "Q741x_1", "Q741x_2", "Q741x_3", "Q741x+inh_1", "Q741x+inh_2", "Q741x+inh
_3"))
#sample_label <- as.character(c("W1", "W2", "W3", "iW1", "iW2", "iW3", "Q1", "Q2",
"Q3", "iQ1", "iQ2", "iQ3"))
areaPept <- read_excel(data_path, sheet = "Area - peptides")
areaProt <- read_excel(data_path, sheet = "Area - proteins")
```

Now the SWATH data at peptide and protein levels are ready for downstream analyses.

Showing the first 10 rows of SWATH dataset at the peptide level;

Hide

```
head(areaPept, n = 10)
```

| Protein<br><chr>     | Peptide<br><chr>   | Precursor MZ<br><dbl> | Precursor Charge<br><dbl> | RT<br><dbl> |
|----------------------|--------------------|-----------------------|---------------------------|-------------|
| sp Q8VDD5 MYH9_MOUSE | ALELDSNLYR         | 597                   | 2                         | 28.7        |
| sp Q8VDD5 MYH9_MOUSE | VSHLLGINVDFTR      | 525                   | 3                         | 35.1        |
| sp Q8VDD5 MYH9_MOUSE | AGVLAHLEEER        | 409                   | 3                         | 22.2        |
| sp Q8VDD5 MYH9_MOUSE | LDPHLVLDQLR        | 440                   | 3                         | 33.9        |
| sp Q8VDD5 MYH9_MOUSE | VVFQEFR            | 463                   | 2                         | 25.2        |
| sp Q8VDD5 MYH9_MOUSE | LQQELDLLVLDLHQR    | 651                   | 3                         | 43.4        |
| sp Q8VDD5 MYH9_MOUSE | SMEAEMIQLQEELAAAER | 684                   | 3                         | 48.5        |
| sp Q8VDD5 MYH9_MOUSE | VIQYLAHVASSHK      | 364                   | 4                         | 18.5        |
| sp Q8VDD5 MYH9_MOUSE | YEILTPNSIPK        | 638                   | 2                         | 29.7        |
| sp P26039 TLN1_MOUSE | EQGVVEEHETLLLR     | 518                   | 3                         | 22.7        |

1-10 of 10 rows | 1-5 of 17 columns

And at the protein level;

Hide

```
head(areaProt, n = 10)
```

| Protein               | 020518 Somchai (Greis)_SWATH_W1 (Data020518_02.w |
|-----------------------|--------------------------------------------------|
| <chr>                 |                                                  |
| sp Q8VDD5 MYH9_MOUSE  |                                                  |
| sp P26039 TLN1_MOUSE  |                                                  |
| sp Q68FD5 CLH1_MOUSE  |                                                  |
| sp P58252 EF2_MOUSE   |                                                  |
| sp P07901 HS90A_MOUSE |                                                  |
| sp Q8BTM8 FLNA_MOUSE  |                                                  |
| sp P52480 KPYM_MOUSE  |                                                  |
| sp Q9JHU4 DYHC1_MOUSE |                                                  |
| sp P20029 GRP78_MOUSE |                                                  |
| sp P08113 ENPL_MOUSE  |                                                  |

1-10 of 10 rows | 1-2 of 13 columns

In this analysis, we use SWATH quantitative data at the protein level for downstream data processing.

## Gene mapping

UniProt IDs can be mapped to gene names using useMart and getBM functions in BiomaRt package.

Hide

```
# Gene mapping using biomaRt package (ref#1)
df <- areaProt[,1] %>%
  tidyr::separate(Protein, c("sp", "uniProtID", "entry_name"), sep = "\\|") %>%
  tidyr::separate(entry_name, c("entry_names", "species"), sep = "_") %>%
  dplyr::select(uniProtID, entry_names, species)
ensembl <- useMart("ensembl", dataset="mmusculus_gene_ensembl",
  host = "www.ensembl.org",
  ensemblRedirect = FALSE)
tmp <- getBM(attributes = c('uniprotswissprot', 'external_gene_name'),
  filters = 'uniprotswissprot',
  values = df$uniProtID,
  mart = ensembl)
```

```
Batch submitting query [=====]
==>-----] 67% eta: 1s
Batch submitting query [=====]
=====] 100% eta: 0s
```

Hide

```
colnames(tmp) <- c('uniProtID', "gene.SYMBOL")
df <- left_join(df, tmp[!duplicated(tmp$uniProtID), ], by = "uniProtID")
ind <- is.na(df$gene.SYMBOL)
df$gene.SYMBOL[ind] <- df$entry_names[ind]
id_all <- df
```

Hide

```
head(id_all, n = 10)
```

| <b>uniProtID</b><br><chr> | <b>entry_names</b><br><chr> | <b>species</b><br><chr> | <b>gene.SYMBOL</b><br><chr> |
|---------------------------|-----------------------------|-------------------------|-----------------------------|
| Q8VDD5                    | MYH9                        | MOUSE                   | Myh9                        |
| P26039                    | TLN1                        | MOUSE                   | Tln1                        |
| Q68FD5                    | CLH1                        | MOUSE                   | Cltc                        |
| P58252                    | EF2                         | MOUSE                   | Eef2                        |
| P07901                    | HS90A                       | MOUSE                   | Hsp90aa1                    |
| Q8BTM8                    | FLNA                        | MOUSE                   | Flna                        |
| P52480                    | KPYM                        | MOUSE                   | Pkm                         |
| Q9JHU4                    | DYHC1                       | MOUSE                   | Dync1h1                     |
| P20029                    | GRP78                       | MOUSE                   | Hspa5                       |
| P08113                    | ENPL                        | MOUSE                   | Hsp90b1                     |

1-10 of 10 rows

## Quantile normalization and missing value handling

For data preprocessing, the `normalize.quantiles` function of `preprocessCore` package is applied, while missing values are replaced by zero.

Hide

```
## Quantile normalization using preprocessCore package (ref#2)
expr_raw <- areaProt[ , 2:length(areaProt)]
colnames(expr_raw) <- sample_label
Quantile <- as.data.frame(normalize.quantiles(log2(as.matrix(expr_raw))))
colnames(Quantile) <- sample_label
## Missing values replaced by zero
ind <- which(is.na(Quantile), arr.ind = TRUE)
Quantile[ind] <- 0
expr_processed <- Quantile
## Collect datasets
raw_ds <- cbind(id_all, expr_raw)
process_ds <- cbind(id_all, expr_processed)
df <- t(expr_processed)
colnames(df) <- id_all$gene.SYMBOL
log_ds <- data.frame(group, df)
# End: Data preprocess -----
-----
```

Once the preprocessing finished, we got the process dataset at the protein level, in which the quantitative data are expressed in log2 values.

Hide

```
head(process_ds, n=10)
```

|    | uniProtID<br><chr> | entry_names<br><chr> | species<br><chr> | gene.SYMB...<br><chr> | ...<br><dbl> | ...<br><dbl> | ...<br><dbl> | WT+in...<br><dbl> | WT+in...<br><dbl> |
|----|--------------------|----------------------|------------------|-----------------------|--------------|--------------|--------------|-------------------|-------------------|
| 1  | Q8VDD5             | MYH9                 | MOUSE            | Myh9                  | 19.8         | 19.8         | 19.7         | 19.7              | 19.8              |
| 2  | P26039             | TLN1                 | MOUSE            | Tln1                  | 19.7         | 19.6         | 19.7         | 19.7              | 19.7              |
| 3  | Q68FD5             | CLH1                 | MOUSE            | Cltc                  | 19.9         | 20.4         | 20.0         | 20.4              | 20.4              |
| 4  | P58252             | EF2                  | MOUSE            | Eef2                  | 20.0         | 20.0         | 20.1         | 20.2              | 20.2              |
| 5  | P07901             | HS90A                | MOUSE            | Hsp90aa1              | 19.5         | 19.4         | 19.4         | 19.9              | 19.9              |
| 6  | Q8BTM8             | FLNA                 | MOUSE            | Flna                  | 17.4         | 17.1         | 17.3         | 17.5              | 17.1              |
| 7  | P52480             | KPYM                 | MOUSE            | Pkm                   | 20.7         | 20.6         | 20.7         | 21.1              | 20.9              |
| 8  | Q9JHU4             | DYHC1                | MOUSE            | Dync1h1               | 17.1         | 17.3         | 17.3         | 17.1              | 17.5              |
| 9  | P20029             | GRP78                | MOUSE            | Hspa5                 | 19.3         | 19.0         | 19.4         | 19.3              | 19.2              |
| 10 | P08113             | ENPL                 | MOUSE            | Hsp90b1               | 19.6         | 19.7         | 19.7         | 19.8              | 19.9              |

1-10 of 10 rows | 1-10 of 16 columns

## Data quality check

The data quality is checked by several measures. The first one is %coefficient of variation (CV).

Hide

```

# Start: Data analysis and visualization -----
-----
## Group average
tmp <- data.frame(group = log_ds[ , 1], 2^log_ds[ , 2:length(log_ds)]) %>%
  gather(gene.SYMBOL, expression, -group) %>%
  dplyr::group_by(group, gene.SYMBOL) %>%
  dplyr::summarize(group_mean = mean(expression)) %>%
  spread(gene.SYMBOL, group_mean)
gr_avr <- as.data.frame(tmp[ , 2:length(tmp)])
rownames(gr_avr) <- tmp$group
gr_pair <- combn(unique(tmp$group), 2)
fc <- (gr_avr[gr_pair[1, ], ] / gr_avr[gr_pair[2, ], ]) %>% log2()
rownames(fc) <- paste0('log2', '(', gr_pair[1, ], '/', gr_pair[2, ], ')')
log2fc_ds <- fc
## Group SD
tmp <- data.frame(group = log_ds[ , 1], 2^log_ds[ , 2:length(log_ds)]) %>%
  gather(gene.SYMBOL, expression, -group) %>%
  dplyr::group_by(group, gene.SYMBOL) %>%
  dplyr::summarize(group_sd = sd(expression)) %>%
  spread(gene.SYMBOL, group_sd)
gr_sd <- as.data.frame(tmp[ , 2:length(tmp)])
rownames(gr_sd) <- tmp$group
## Coefficient of variation
qc <- 100 *gr_sd/gr_avr
qc <- data.frame(group = tmp$group, qc)
QC <- qc %>% gather(gene, CV, -group)
# Calculate median-CV of each group
medianCV <- QC %>% dplyr::group_by(group) %>% summarise(CV = round(median(CV), 1))

```

Median-CVs for each group;

Hide

```

print(paste0("Median-CV: Q741x+inh, ", medianCV[1,2], "%; WT+inh, ", medianCV[2,2]
, "%; Q741x, ", medianCV[3,2], "%; WT, ", medianCV[4,2], "%"))

```

```

[1] "Median-CV: Q741x+inh, 20.4%; WT+inh, 13%; Q741x, 17.2%; WT, 14.9%"

```

Violin plot of inter-group CV

Hide

```

# Violin plot of inter-group CV
plot.qc <- ggplot(QC, aes(x=group, y=CV)) +
  geom_violin(aes(fill = as.character(group)), trim=FALSE, width = 0.8
, #aes(fill = group),
              na.rm = TRUE, position = "dodge")+
  labs(fill = "") +
  geom_boxplot(width=0.1, fill = 'white', outlier.size = 0,
              na.rm = TRUE, position = "dodge")+
  geom_text(data = medianCV, aes(label = CV), position = position_dodge
e(width = 1),
           hjust = -0.5, vjust = -0.5, size = 5) +
  xlab("") + ylab("% Coefficient of Variation") +
  scale_y_continuous(breaks=c(0, 10, 20, 50, ceiling(max(QC$CV, na.rm=
TRUE)))) +
  theme_light(base_size = 12)
plot.qc

```

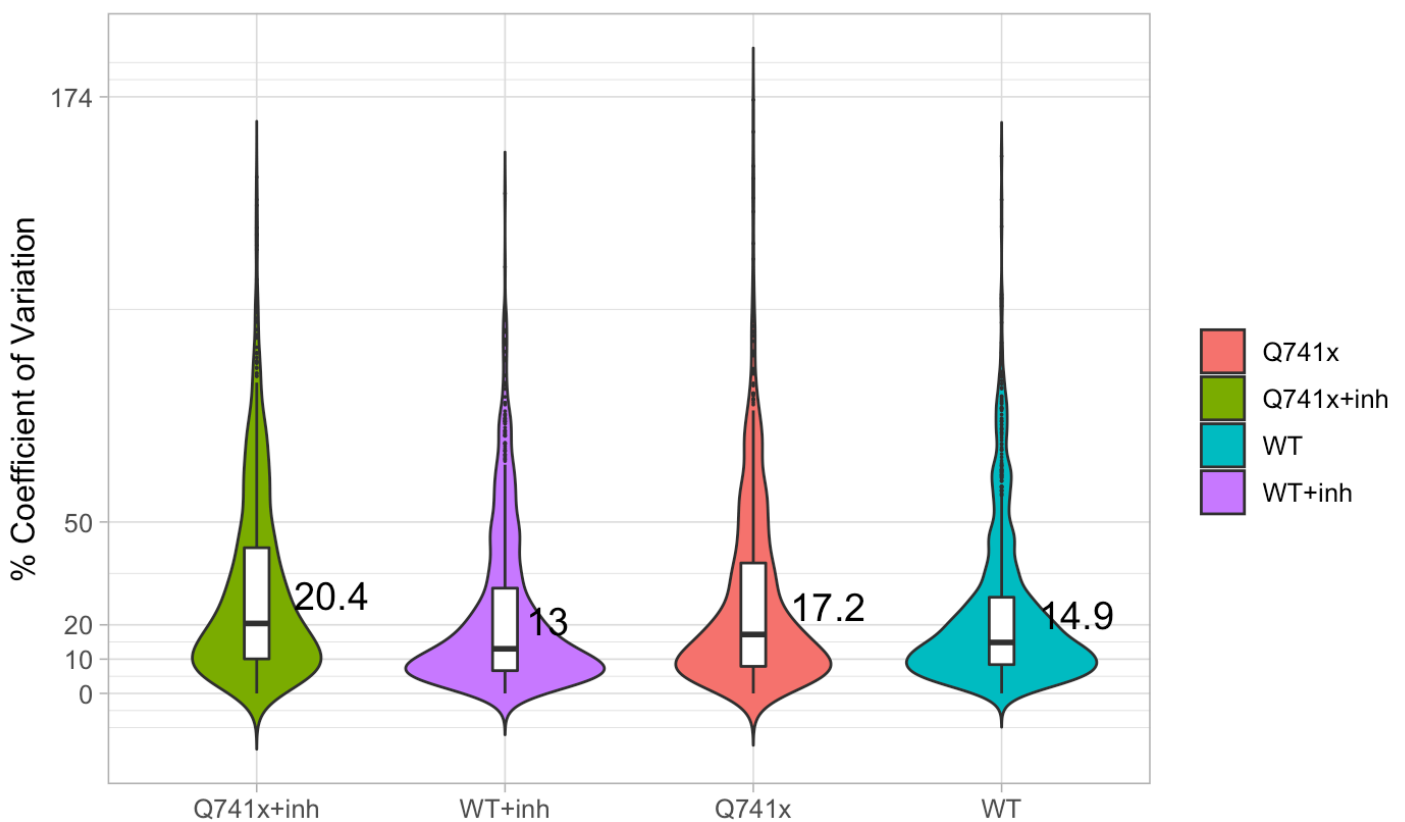

Correlation heatmap

Hide

```

## Correlation heatmap
corr <- 2^expr_processed
corr <- round(cor(corr, method = "pearson"),3)
corr[lower.tri(corr)] <- NA
melted_corr <- melt(corr, na.rm = TRUE)
plot_corrHM <- ggplot(data = melted_corr, aes(x = Var2, y = Var1, fill = value))+
  geom_tile(color = "white")+
  scale_fill_gradient2(low = "white", high = "red", mid = "yellow"
,
                        midpoint = 0.9, limit = c(0.8, 1), space =
"Lab",
                        name= paste("Pearson", "\ncorrelation") ) +
  labs(x = "", y = "") +
  theme_minimal() +
  theme(axis.text.x = element_text(angle = 90, vjust = 1,
                                    size = 8, hjust = 1)) +
  coord_fixed() +
  geom_text(aes(label = value), color = "black", size = 2) +
  theme(axis.text.y = element_text(color = "black", size=8),
        panel.grid.major = element_blank(),
        panel.border = element_blank(),
        panel.background = element_blank(),
        axis.ticks = element_blank(),
        legend.justification = c(1, 0),
        legend.position = c(0.6, 0.7),
        legend.direction = "horizontal")+
  guides(fill = guide_colorbar(barwidth = 7, barheight = 1,
                               title.position = "top", title.hjust = 0.5))
plot_corrHM

```

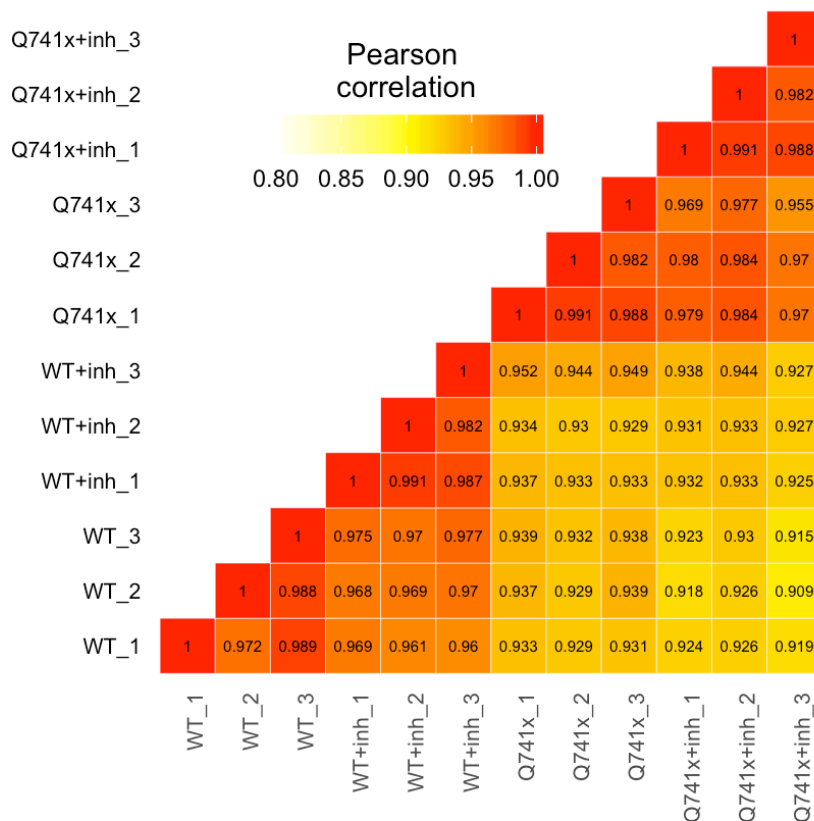



## The plot for the numbers of peptide per protein

Hide

```
## nPP plot
n_pept_prot <- areaPept %>%
  dplyr::group_by(Protein) %>%
  dplyr::summarize(n_pept = n()) %>%
  arrange(desc(n_pept))
nPP <- data.frame(n_pept = c("1", "2-5", "6-10"),
  n_prot = rbind(n_pept_prot %>% filter(n_pept ==1) %>% nrow(),
  n_pept_prot %>% filter(n_pept >=2 & n_pept <= 5
) %>% nrow(),
  n_pept_prot %>% filter(n_pept >=6) %>% nrow()))
nPP_plot <- ggplot(nPP, aes(x = n_pept, y= n_prot)) +
  geom_bar(stat = "identity", fill = "steelblue") +
  ylim(0, max(nPP$n_prot)+50) +
  geom_text(aes(label= n_prot), vjust=-0.3, color="black", size=
4.5) +
  geom_text(aes(label= paste0(round(100*n_prot/sum(n_prot), 1),
"%")), vjust=1.6, color="white", size=4.5) +
  xlab("Numbers of peptide") + ylab("Numbers of protein") +
  theme_light(base_size = 12)
nPP_plot
```

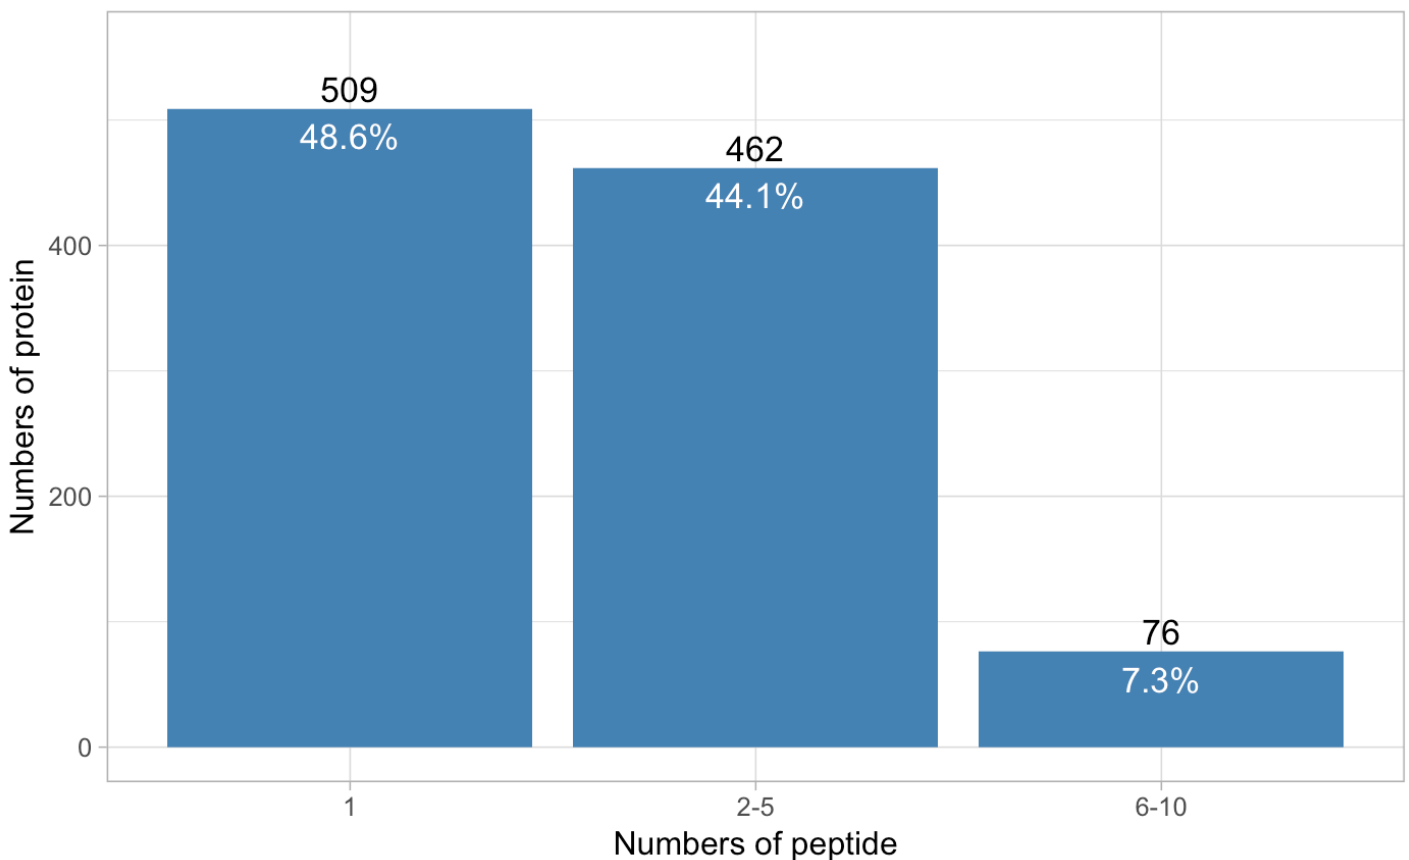

## PCA individual plot

Hide

```
## PCA individual plot using FactorMineR package (ref#3)
fit_pca <- PCA(log_ds[ , 2:length(log_ds)], graph = FALSE, scale.unit = TRUE)
percentage <- fit_pca$eig[ , 2]
PCs <- data.frame(fit_pca$ind$coord)
PCs$group <- as.character(group)
plotPCA <- ggplot(data = PCs, aes(x = Dim.1, y = Dim.2)) +
  geom_point(aes(colour = group), size = 3) +
  labs(colour = '') +
  xlab(paste0('PC1', ' ', '(', round(percentage[1], 2), '%)')) +
  ylab(paste0('PC2', ' ', '(', round(percentage[2], 2), '%)')) +
  scale_fill_hue(l=40) +
  coord_fixed(ratio=1, xlim=range(PCs$Dim.1), ylim=range(PCs$Dim.2)) +
  geom_text_repel(label = rownames(PCs)) +
  theme_light(base_size = 15)
```

plotPCA

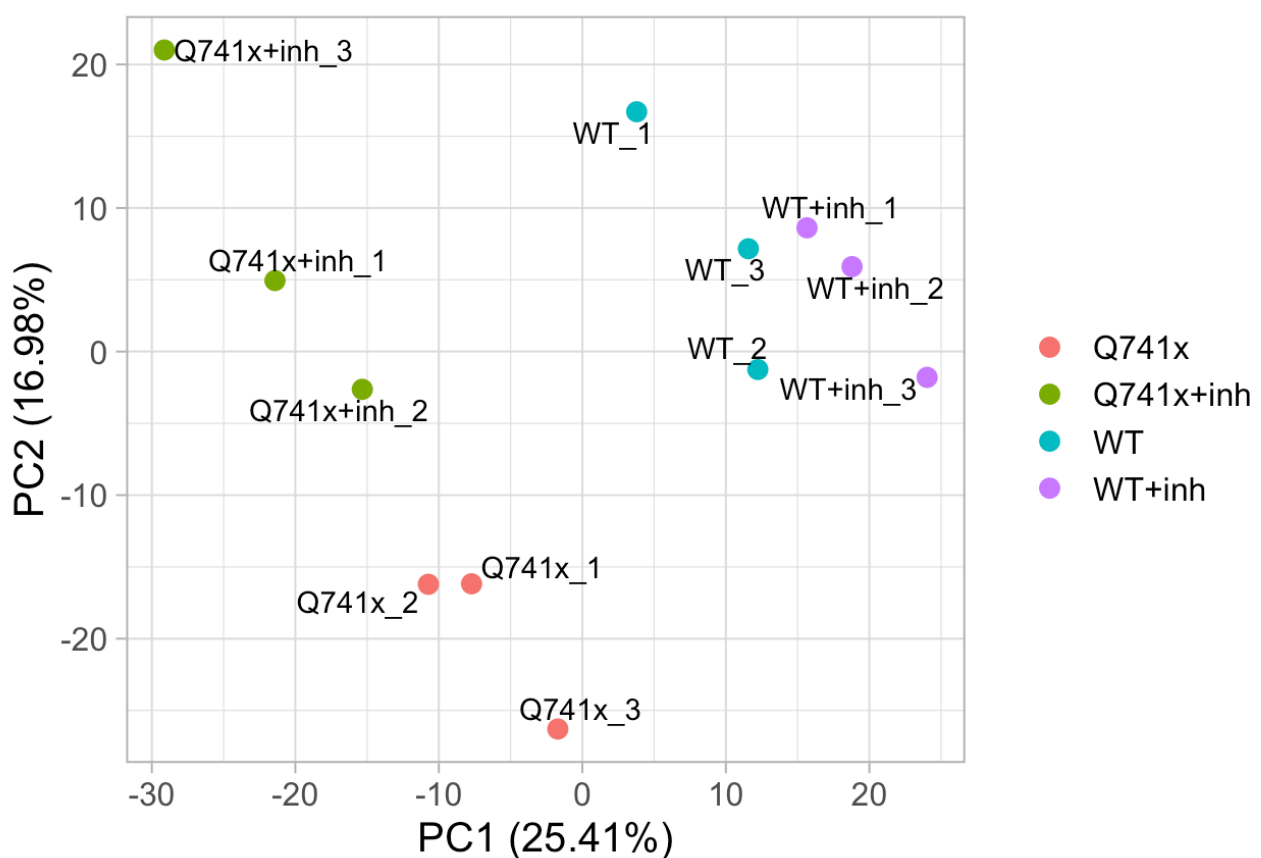

NOTE: The contributions of protein variables of each component can be extracted from the fit\_pca object for in-depth biological interpretation.

Hide

```
head(fit_pca[["var"]][["contrib"]], n = 10)
```

|          | Dim.1  | Dim.2   | Dim.3   | Dim.4    | Dim.5    |
|----------|--------|---------|---------|----------|----------|
| Myh9     | 0.0607 | 0.35234 | 0.00352 | 0.005935 | 0.029067 |
| Tln1     | 0.2853 | 0.04184 | 0.00242 | 0.012616 | 0.015562 |
| Cltc     | 0.0121 | 0.38603 | 0.11048 | 0.060218 | 0.053396 |
| Eef2     | 0.3336 | 0.02708 | 0.00107 | 0.001344 | 0.009143 |
| Hsp90aa1 | 0.0122 | 0.41772 | 0.10758 | 0.000423 | 0.005738 |
| Flna     | 0.2242 | 0.02023 | 0.03532 | 0.170729 | 0.024465 |
| Pkm      | 0.1944 | 0.08087 | 0.14988 | 0.008074 | 0.001413 |
| Dync1h1  | 0.0131 | 0.01155 | 0.02371 | 0.354755 | 0.080413 |
| Hspa5    | 0.0934 | 0.00388 | 0.00606 | 0.005852 | 0.601517 |
| Hsp90b1  | 0.2801 | 0.09564 | 0.02236 | 0.001281 | 0.000225 |

Lastly, the protein abundance heatmap (values in the log10 scale) where the missing values are mapped in black color.

Hide

```
## Protein abundance heatmap by pheatmap package (ref#4)
qc_hm <- 2^expr_processed
rownames(qc_hm) <- process_ds$gene.SYMBOL
for(i in seq_along(qc_hm)){
  if(qc_hm[i] != 0){
    qc_hm[i] <- log10(qc_hm[i])
  } else {
    qc_hm[i] <- 0
  }
}
n_missing <- sum(qc_hm == 0)
n_total <- dim(qc_hm)[1] * dim(qc_hm)[2]
```

Hide

```
print(paste0("QC_heatmap: Total ", n_total, " data points; ", n_missing, " missing
values (", round(100*n_missing/n_total, 2), "%) showed in black"))
```

```
[1] "QC_heatmap: Total 12564 data points; 7 missing values (0.06%) showed in black
)"
```

Hide

```
qc_hm_plot <- pheatmap(t(qc_hm),
                        breaks = seq(0, max(qc_hm), length.out=101),
                        legend_breaks = seq(0, round(max(qc_hm), 0), length.out=8
),
                        legend_labels = c("1e+00", "1e+01", "1e+02", "1e+03", "1e
+04", "1e+05", "1e+06", "1e+07"),
                        color = colorRampPalette(c("black", "#8ealff", "#14ff57",
"yellow", "orange", "#ea4444"))(100),
                        border_color = "gray",
                        clustering_distance_cols = "maximum",
                        clustering_method_columns = "complete",
                        cluster_rows = FALSE,
                        fontsize_row = 8, fontsize_col = 1,
                        scale = "none")
```

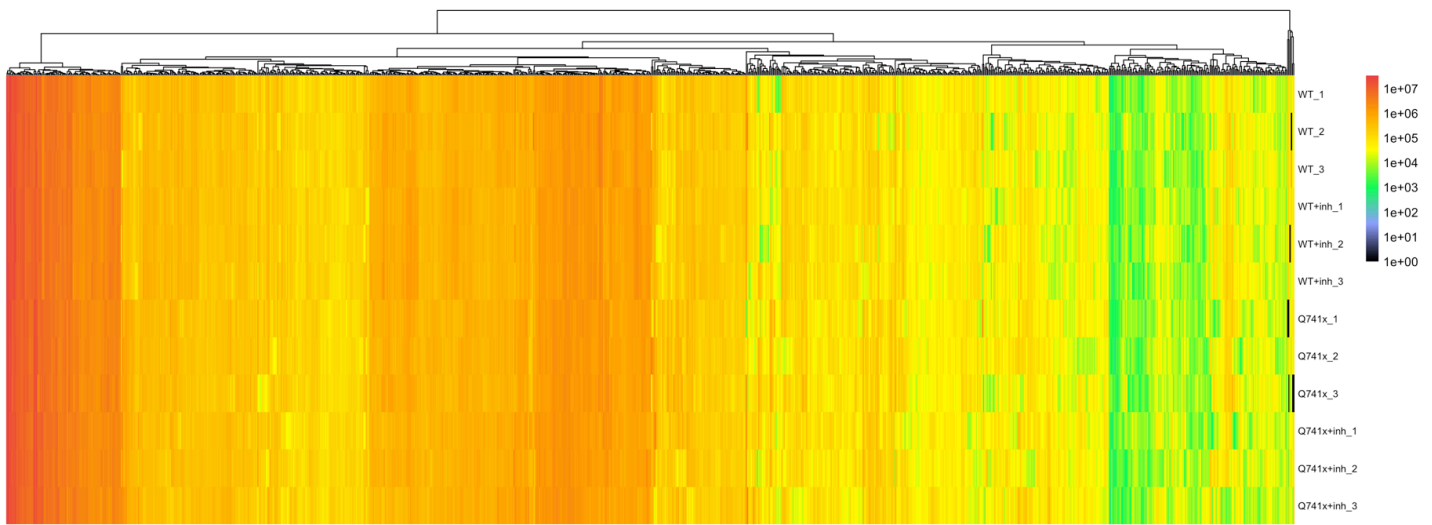

## Data analysis and visualization

Differential expression analysis for multiple group comparison is performed by ANOVA with Tukey's post-hoc.

Hide

```
## ANOVA with Tukey's post-hoc
tmp <- as.matrix(log_ds[, 2:length(log_ds)])
fit.aov <- aov(tmp ~ group)
output.aov <- summary.aov(fit.aov)
anova.pVal <- numeric(length = ncol(tmp))
for (i in 1:length(output.aov)){
  anova.pVal[i] <- output.aov[[i]][1, 5]
}
adj.pVal <- matrix(nrow = ncol(tmp), ncol = nrow(log2fc_ds))
colnames(adj.pVal) <- paste(gr_pair[1, ], " vs ", gr_pair[2, ])
rownames(adj.pVal) <- colnames(tmp)
for (i in 1:ncol(tmp)){
  adj.pVal[i, ] <- (TukeyHSD((aov(tmp[, i] ~ group))))[[1]][ ,4]
}
anova_ds <- cbind(anova.pVal, adj.pVal)
```

The ANOVA p-values (the first column) and the adjusted p-values from Tukey's posthoc for each pairwise comparison (as labelled in the column name) are ready for further use.

Hide

```
head(anova_ds, n=10)
```

|          | anova.pVal | Q741x+inh vs WT+inh | Q741x+inh vs Q741x | Q741x+inh vs WT |
|----------|------------|---------------------|--------------------|-----------------|
| Myh9     | 2.75e-02   | 0.538046            | 0.2710             | 0.49571         |
|          | 3.95e-02   | 0.9998              | 0.035361           |                 |
| Tln1     | 2.33e-03   | 0.004109            | 0.6777             | 0.00979         |
|          | 1.76e-02   | 0.8966              | 0.045834           |                 |
| Cltc     | 1.50e-03   | 0.896792            | 0.0110             | 0.25091         |
|          | 2.80e-02   | 0.0970              | 0.000996           |                 |
| Eef2     | 6.85e-05   | 0.000107            | 0.5638             | 0.00106         |
|          | 3.54e-04   | 0.1473              | 0.004905           |                 |
| Hsp90aa1 | 1.60e-02   | 0.719928            | 0.0536             | 0.94154         |
|          | 1.25e-02   | 0.4196              | 0.117739           |                 |
| Flna     | 2.88e-02   | 0.161970            | 0.9625             | 0.10916         |
|          | 8.33e-02   | 0.9914              | 0.055835           |                 |
| Pkm      | 1.35e-03   | 0.002028            | 1.0000             | 0.36323         |
|          | 2.01e-03   | 0.0176              | 0.360103           |                 |
| Dync1h1  | 6.30e-01   | 0.999364            | 0.7075             | 0.95402         |
|          | 6.42e-01   | 0.9197              | 0.937132           |                 |
| Hspa5    | 4.80e-01   | 0.417546            | 0.7729             | 0.73844         |
|          | 9.08e-01   | 0.9302              | 0.999893           |                 |
| Hsp90b1  | 5.01e-05   | 0.000157            | 0.8479             | 0.00501         |
|          | 7.97e-05   | 0.0407              | 0.001931           |                 |

Data including the fold changes and the adjusted p-values of proteins in each pairwise are ready for the volcano plots.

Hide

```
## Pairwise-Volcano plot
tmp <- data.frame(gene = rownames(anova_ds), anova_ds)
colnames(tmp) <- c("gene", "anova.pVal", paste0(gr_pair[1, ], "/", gr_pair[2, ]))
long_ano <- gather(tmp, compare, adj_pVal, -gene, -anova.pVal)
fc.vp <- t(log2fc_ds)
fc.vp <- data.frame(gene = colnames(log2fc_ds), fc.vp)
colnames(fc.vp) <- c("gene", paste0(gr_pair[1, ], "/", gr_pair[2, ]))
long_fc <- gather(fc.vp, compare, log2FC, -gene)
long_ano.fc <- long_ano %>%
  left_join(long_fc, by = c("gene", "compare"))
long_ano.fc$gene <- as.character(long_ano.fc$gene)
```

Here is the multiple pairwise volcano plots, where the red dots represent the relevant proteins based on the thresholds of >1.5x fold change and the adjusted p-value <0.05;

Hide

```

volcano_all <- ggplot(data = long_ano.fc, aes(x= log2FC, y=-log10(adj_pVal))) +
  geom_point(aes(color = as.factor(abs(log2FC) >= log2(1.5) & anova.pVal < 0.05 & adj_pVal < 0.05)), size = 3, show.legend = FALSE) + #alpha = 0.5,
  scale_color_manual(values = c("grey", "red")) +
  xlab("log2 (fold change)") + ylab("-log10 (adjusted p-value)")
+
  # ggtitle(label = paste0("Volcano plot at ", 1.5,
  # "x fold change and adjusted P-value <
  # ", 0.05)) +
  theme_grey(base_size = 15) +
  geom_text_repel(data = (subset(long_ano.fc,
  abs(log2FC) > 2 & -log10(adj_pVal) > 1.33 | -log10(adj_pVal) > 6)),
  aes(label = gene, size = 0.1),
  show.legend = FALSE,
  colour = 'darkblue',
  # box.padding = unit(0.35, "lines"),
  point.padding = unit(0.5, "lines")
  ) +
  facet_wrap(~ compare)
volcano_all

```

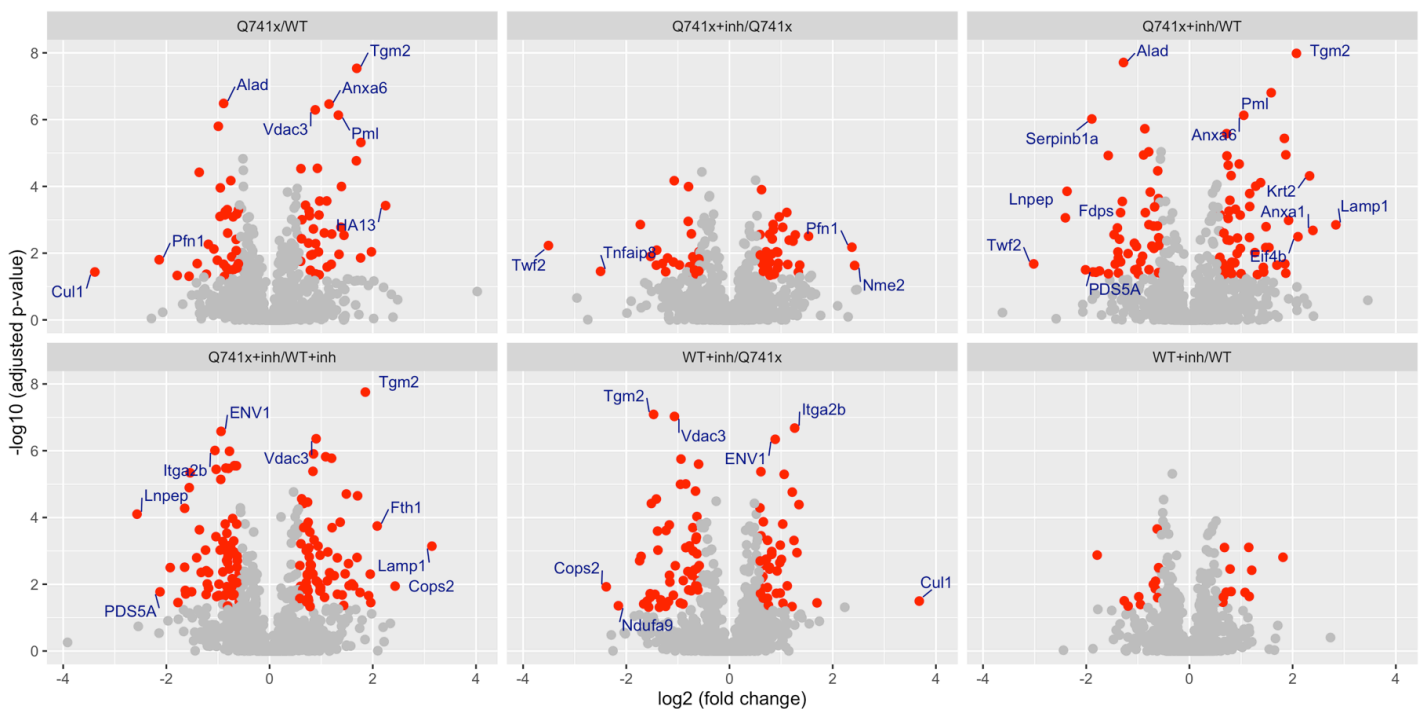

The lists of relevant proteins can be extracted from the long.ano.fc object;

Hide

```
head(long_ano.fc, n=10)
```

|   | gene<br><chr> | anova.pVal<br><dbl> | compare<br><chr> | adj_pVal<br><dbl> | log2FC<br><dbl> |
|---|---------------|---------------------|------------------|-------------------|-----------------|
| 1 | Myh9          | 2.75e-02            | Q741x+inh/WT+inh | 0.538046          | 0.0935          |

|    |          |          |                  |          |         |
|----|----------|----------|------------------|----------|---------|
| 2  | Tln1     | 2.33e-03 | Q741x+inh/WT+inh | 0.004109 | -0.5089 |
| 3  | Cltc     | 1.50e-03 | Q741x+inh/WT+inh | 0.896792 | -0.0690 |
| 4  | Eef2     | 6.85e-05 | Q741x+inh/WT+inh | 0.000107 | -0.7151 |
| 5  | Hsp90aa1 | 1.60e-02 | Q741x+inh/WT+inh | 0.719928 | -0.1858 |
| 6  | Flna     | 2.88e-02 | Q741x+inh/WT+inh | 0.161970 | 0.4186  |
| 7  | Pkm      | 1.35e-03 | Q741x+inh/WT+inh | 0.002028 | -0.4366 |
| 8  | Dync1h1  | 6.30e-01 | Q741x+inh/WT+inh | 0.999364 | 0.0309  |
| 9  | Hspa5    | 4.80e-01 | Q741x+inh/WT+inh | 0.417546 | -0.1744 |
| 10 | Hsp90b1  | 5.01e-05 | Q741x+inh/WT+inh | 0.000157 | -0.4749 |

1-10 of 10 rows

For example, a list of 61 relevant proteins (in gene names) can be extracted from the Q741x+inh/Q741x condition at the threshold of >1.5x fold changes and adj.pVal < 0.05. The protein list can be used for further biological interpretation;

Hide

```
long_ano.fc %>% filter(compare == "Q741x+inh/Q741x") %>% filter(abs(log2FC) >= log
2(1.5)) %>% filter(adj_pVal < 0.05) %>% .$gene
```

```
[1] "Uba1"      "Iqgap1"    "Pabpc1"    "Serpina1a" "Rps4x"     "Pgam1"     "Mdh2"
"   "Phb2"    "Copb2"    "Gsn"       "Etf1"
[12] "Pfn1"      "Capzb"     "RL10A"     "Psmc6"     "Hsd17b4"   "Uqcrc1"    "Ssb"
"Hnrnpab"   "Rps27a"    "Gcn1"      "Rps15a"
[23] "Fdps"      "Rps19"     "Hars"      "Sri"       "Smad5"     "Sae1"     "Dcps"
"   "Tpp2"    "Fth1"     "Hnrnpul2"  "Gm2000"
[34] "Rps25"     "Dnpep"     "Grb2"      "Nme2"     "Ahcy11"    "Lamp2"     "Twf2"
"   "Anp32b"   "Cox6c"     "Lpcat3"    "Lnpep"
[45] "Metap2"    "Rtn3"      "Atp5d"     "Ndufa12"   "SNX3"      "Krt2"      "Tnfa"
ip8"  "Uqcrc10"  "Srp9"      "VAMP8"     "CPNS1"
[56] "Atp5k"     "Nmt1"      "Pdk3"      "Rrm2"     "Gabpa"     "Sec61b"
```

Finally, the significant protein heatmap demonstrated several protein clusters distinct to each treatment conditions which can be used later for in-depth biological interpretation. The heatmap is plotted using the pheatmap function of pheatmap package.

Hide

```

## Significant protein heatmap by pheatmap (ref#4)
tmp <- as.matrix(log_ds[ , 2:length(log_ds)])
med <- apply(t(tmp), 1, mean)
medScale <- (t(tmp) - med)
tmp <- anova_ds[, 1]
medScale <- data.frame(medScale,
                      anova_pVal = tmp,
                      gene = rownames(medScale))
colnames(medScale) <- c("WT_1", "WT_2", "WT_3", "WT+inh_1", "WT+inh_2", "WT+inh_3",
, "Q741x_1", "Q741x_2", "Q741x_3", "Q741x+inh_1", "Q741x+inh_2", "Q741x+inh_3", "a
nova_pVal", "gene")
medScale_sig <- medScale %>% filter(anova_pVal < 0.05)
rownames(medScale_sig) <- medScale_sig$gene
medScale_sig <- medScale_sig[, 1:(length(medScale_sig) - 2)]
nprot_sig <- nrow(medScale_sig)
group <- factor(group, ordered = TRUE,
               levels = c("WT+inh", "Q741x+inh", "Q741x", "WT"))
hm_sig <- pheatmap(medScale_sig, silent = FALSE,
                  breaks = seq(-(max(round(medScale_sig, 0))), max(round(medScale
le_sig, 0))), length.out=101),
                  legend_breaks = seq(-(max(round(medScale_sig, 0))), max(round
(medScale_sig, 0))), length.out=5),
                  color = colorRampPalette(c("darkblue", "blue", "white", "oran
gered", "red"))(100),
                  border_color = NA,
                  annotation_col = data.frame(group = group, #factor(group),
                                             row.names = sample_label),
                  clustering_distance_rows = "correlation",
                  clustering_distance_cols = "correlation",
                  clustering_method = "average",
                  fontsize_row = 2, fontsize_col = 10,
                  scale = "none")

```

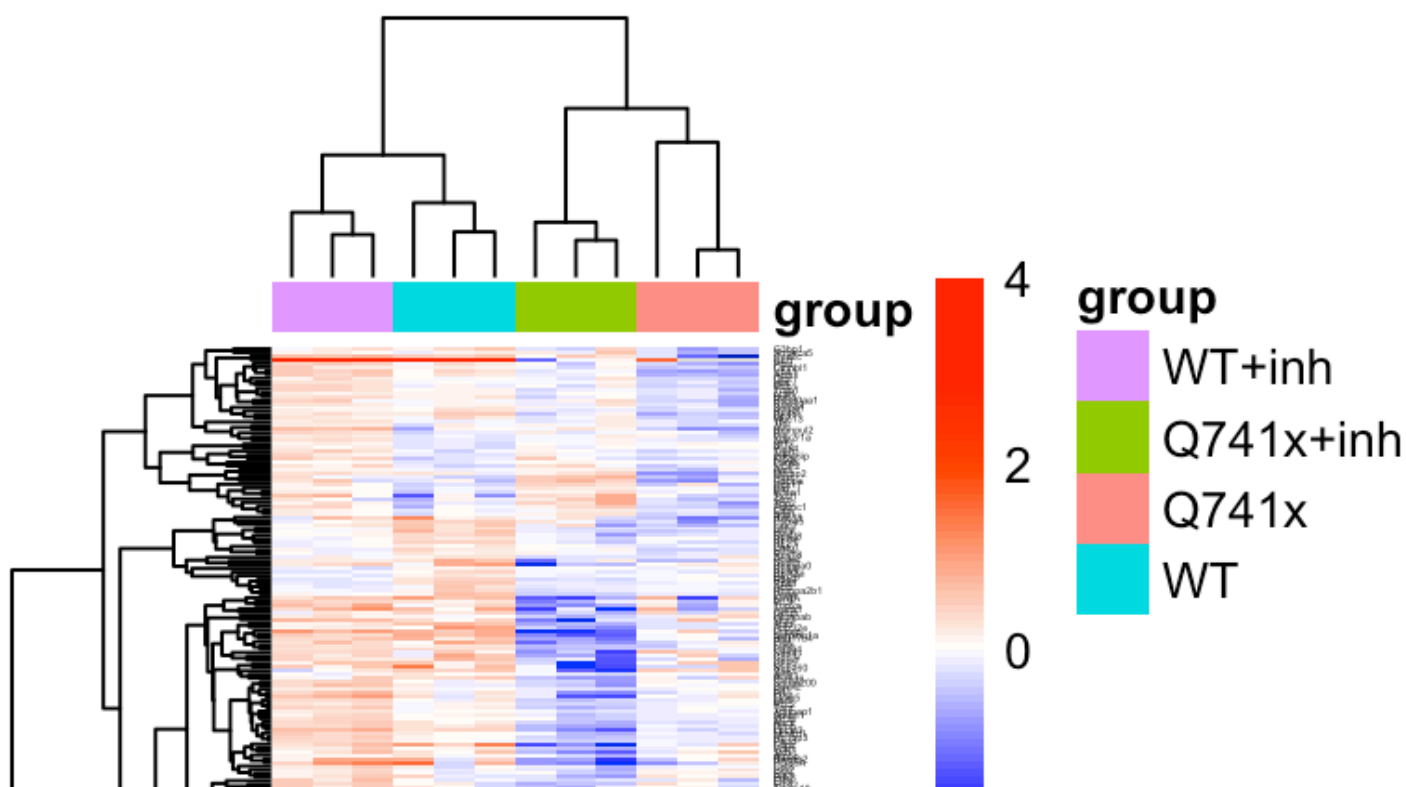



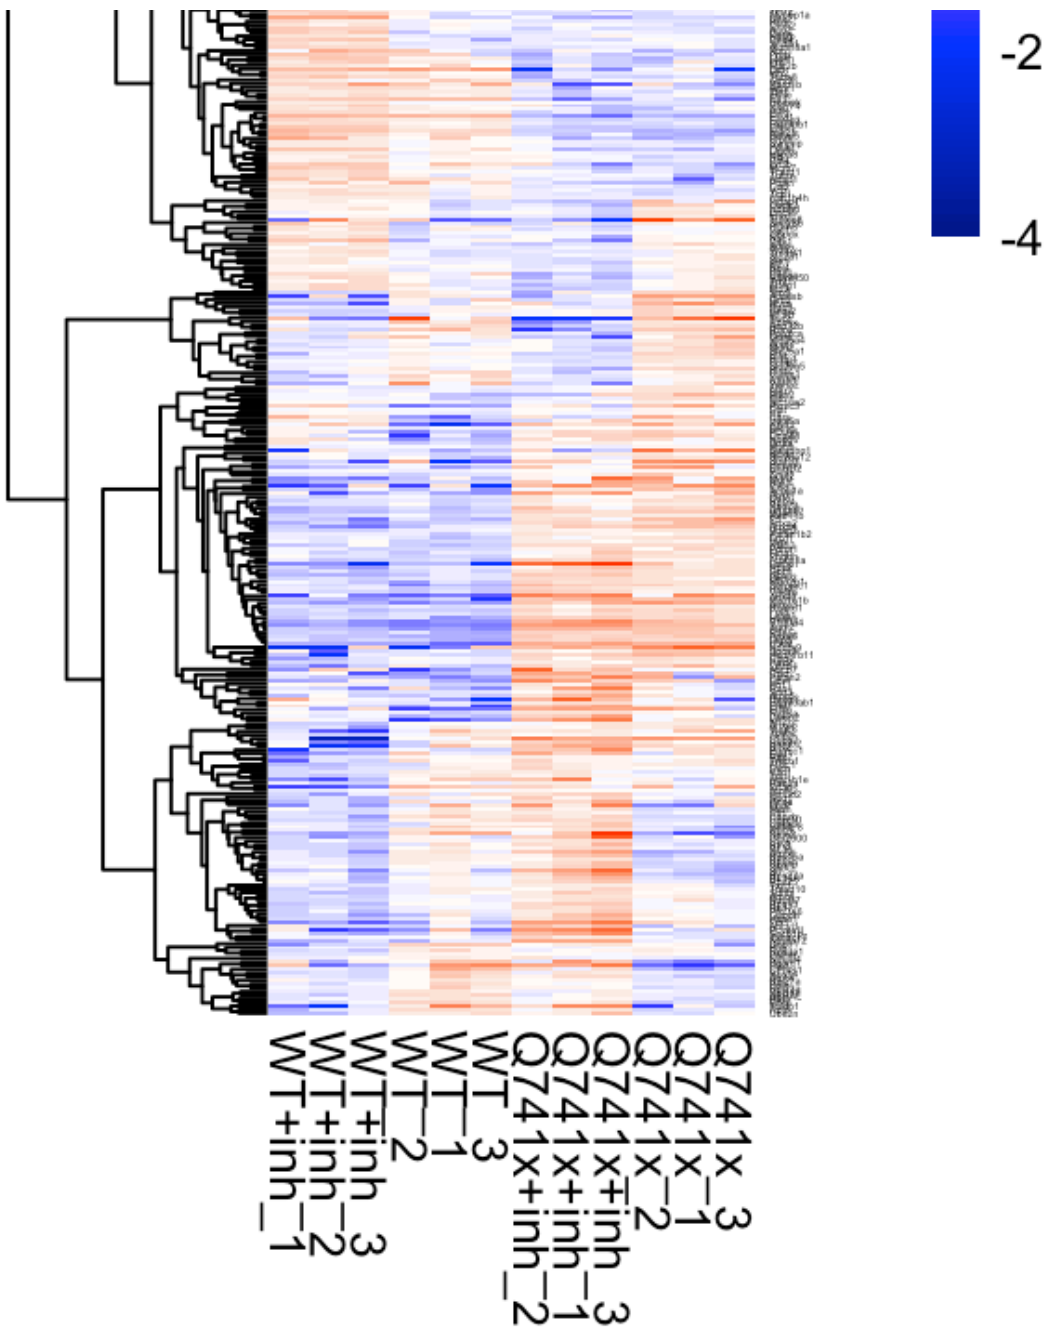

Hide

NA

The heatmap parameters are provided here for a reproducibility purpose.

Hide

```
print(paste0("Significant protein heatmap:", nprot_sig, " significant proteins (ANOVA p-value < ", 0.05, ") ", "; Scale: Log2(fold change) with mean center", "; Clustering: Correlation distance and average linkage"))
```

```
[1] "Significant protein heatmap:397 significant proteins (ANOVA p-value < 0.05); Scale: Log2(fold change) with mean center; Clustering: Correlation distance and average linkage"
```

Hide

```
# End: Data analysis and visualization -----
-----
# References
## 1. Durinck S, Spellman P, Birney E, Huber W (2009). "Mapping identifiers for the
integration of genomic datasets with the R/Bioconductor package biomaRt." Nature
Protocols, 4, 1184–1191.
## 2. Bolstad B (2018). preprocessCore: A collection of pre-processing functions.
R package version 1.44.0,
## 3. Lê, S., Josse, J. & Husson, F. (2008). FactoMineR: An R Package for Multivariate
Analysis. Journal of Statistical Software. 25(1). pp. 1-18.
## 4. Raivo Kolde (2018). pheatmap: Pretty Heatmaps. R package version 1.0.10.
```

## Additional analysis

Additional analysis#1: %coefficient of variation of peptide retention time (RT) to reassure the consistency chromatography applied in SWATH acquisition

Hide

```
RT <- read_excel(data_path, sheet = "Observed RT")
RT <- RT %>% filter(Decoy == "FALSE")
RT <- RT[, c(2, 8:length(RT))]
colnames(RT) <- c("Peptides", sample_label)
tRT <- t(RT[, 2:length(RT)])
colnames(tRT) <- RT$Peptides
tRT <- data.frame(group, tRT)
## Group RT average
tmp_RT <- tRT %>%
  gather(Peptides, RT, -group) %>%
  dplyr::group_by(group, Peptides) %>%
  dplyr::summarize(group_mean = mean(RT)) %>%
  spread(Peptides, group_mean)
gr_RT_avr <- as.data.frame(tmp_RT[, 2:length(tmp_RT)])
rownames(gr_RT_avr) <- tmp_RT$group
## Group RT SD
tmp_RT <- tRT %>%
  gather(Peptides, RT, -group) %>%
  dplyr::group_by(group, Peptides) %>%
  dplyr::summarize(group_sd = sd(RT)) %>%
  spread(Peptides, group_sd)
gr_RT_sd <- as.data.frame(tmp_RT[, 2:length(tmp_RT)])
rownames(gr_RT_sd) <- tmp_RT$group
## Coefficient of variation
cv_RT <- 100 *gr_RT_sd/gr_RT_avr
cv_RT <- data.frame(group = tmp_RT$group, cv_RT)
cv_RT$group <- factor(cv_RT$group, ordered = TRUE,
  levels = c("Q741x+inh", "WT+inh", "Q741x", "WT"))
CV_RT <- cv_RT %>% gather(Peptides, CV, -group)
# Calculate median-CV of each group
medianCV_RT <- CV_RT %>% dplyr::group_by(group) %>% summarise(CV = round(median(CV
), 1))
```

Hide

```
print(paste0("Median-CV of peptide RT: Q741x+inh, ", medianCV_RT[1,2], "%; WT+inh, ",
medianCV_RT[2,2], "%; Q741x, ", medianCV_RT[3,2], "%; WT, ", medianCV_RT[4,2],
"%"))
```

```
[1] "Median-CV of peptide RT: Q741x+inh, 1.5%; WT+inh, 0.7%; Q741x, 1.5%; WT, 0.5%"
```

And here is the plot;

```
# Violin plot of inter-group CV
plot.cv_RT <- ggplot(CV_RT, aes(x=group, y=CV)) +
  geom_violin(aes(fill = as.character(group)), trim=FALSE, width = 0.8
, #aes(fill = group),
              na.rm = TRUE, position = "dodge")+
  geom_boxplot(width=0.1, fill = 'white', outlier.size = 0,
              na.rm = TRUE, position = "dodge")+
  #geom_boxplot(width=0.3, outlier.size = 0.1, na.rm = TRUE, position
= "dodge", aes(fill = as.character(group)))+
  geom_text(data = medianCV_RT, aes(label = CV), position = position_d
odge(width = 1),
           hjust = -0.5, vjust = -0.5, size = 5) +
  ylim(0, 20)+
  labs(fill = "")+
  xlab("") + ylab("% Coefficient of Variation of peptide retention tim
e") +
  theme_light(base_size = 12)

plot.cv_RT
```

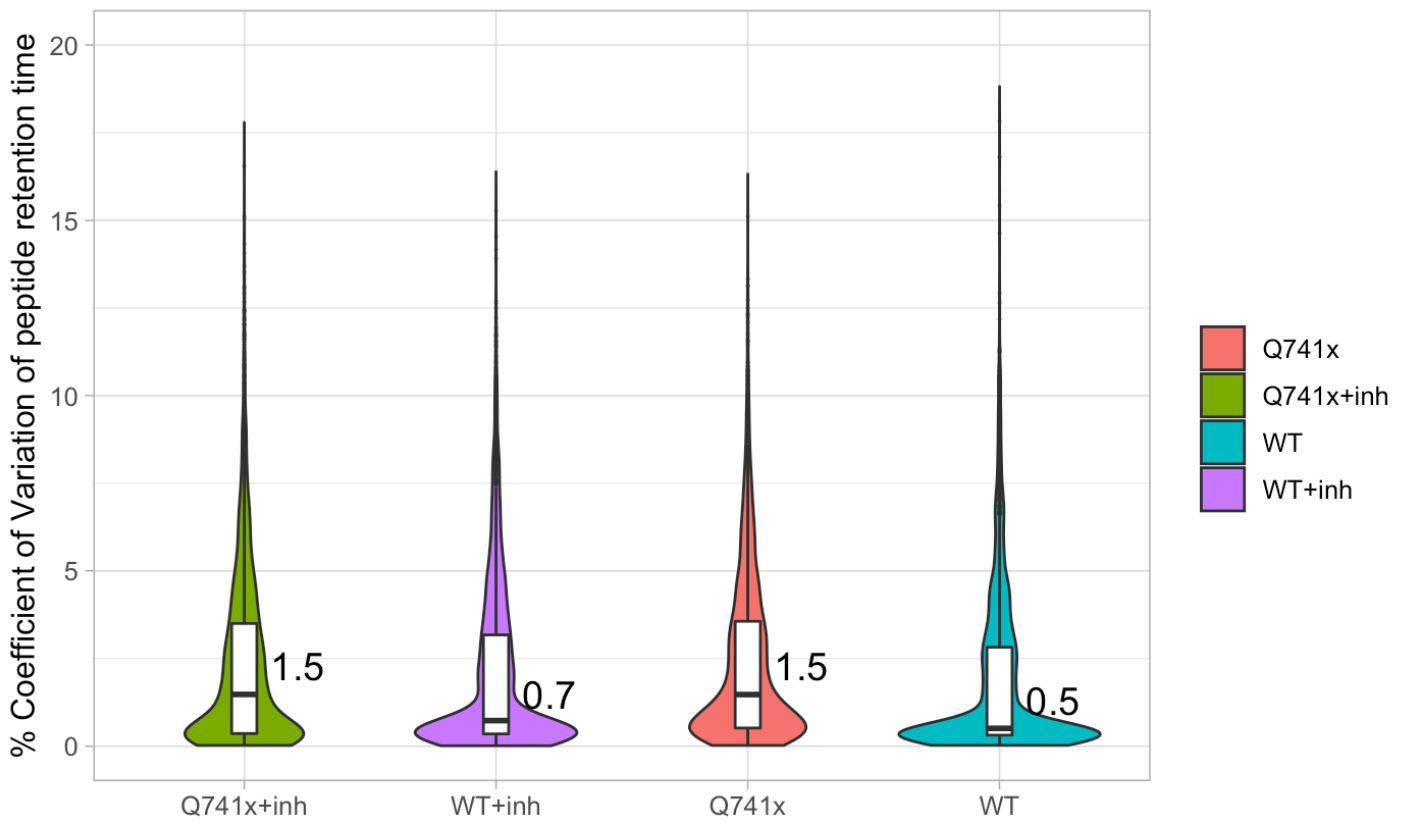

Additional analysis#2: Visualizing the overall shape of comparative data by a histogram of distribution of log2FC;

Hide

```
hist(long_ano.fc$log2FC, breaks = 120, col = "grey", xlab = "log2FC", main = "")
```

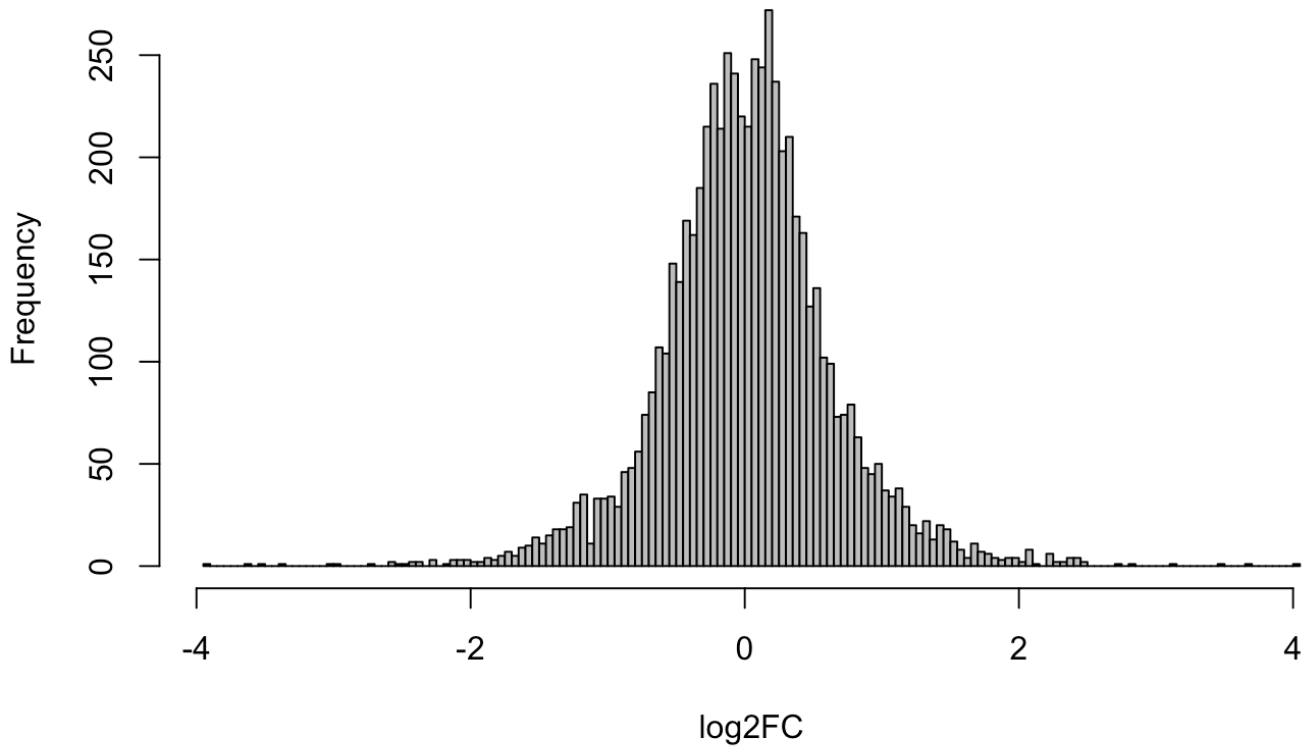

Supplement: NIHMS1624875-supplement-Supplementary_File_1_R_Notebook.pdf [file NIHMS1624875-supplement-Supplementary_File_1_R_Notebook.pdf]
