# Supplementary material
Source: PubMed Central journal article supplement (PMC7492401)

**a**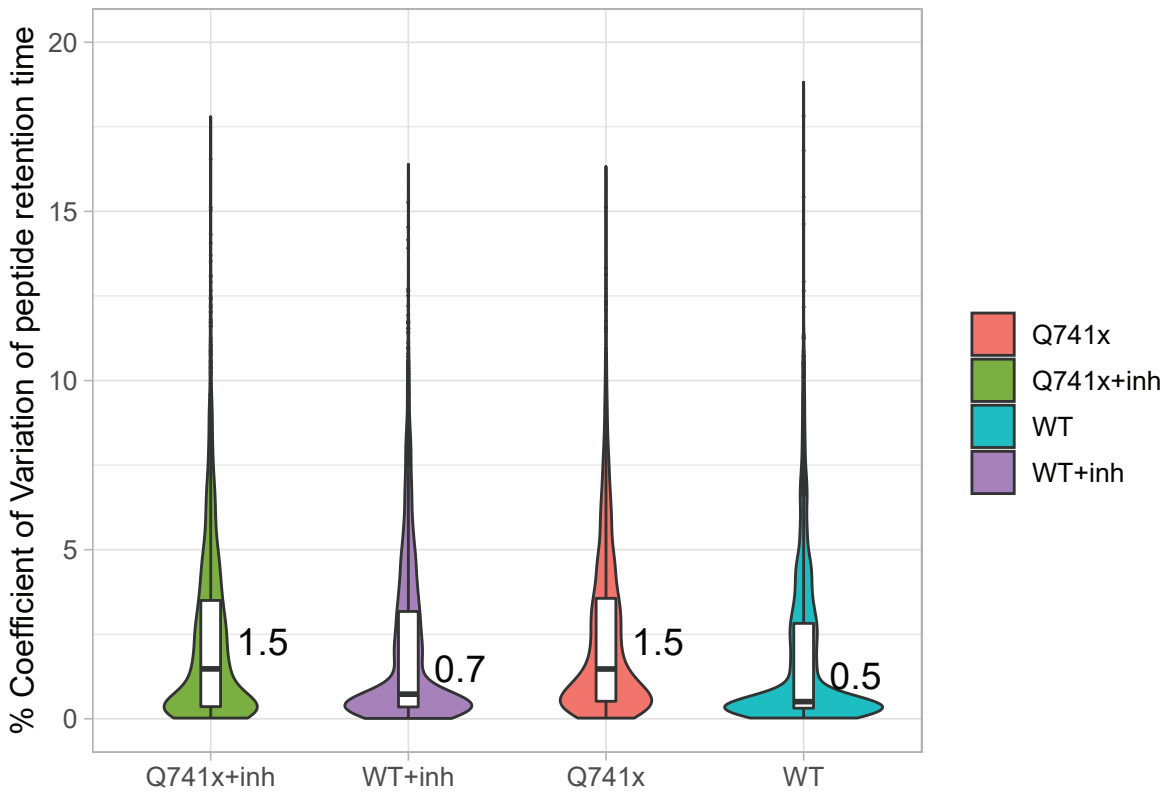**b**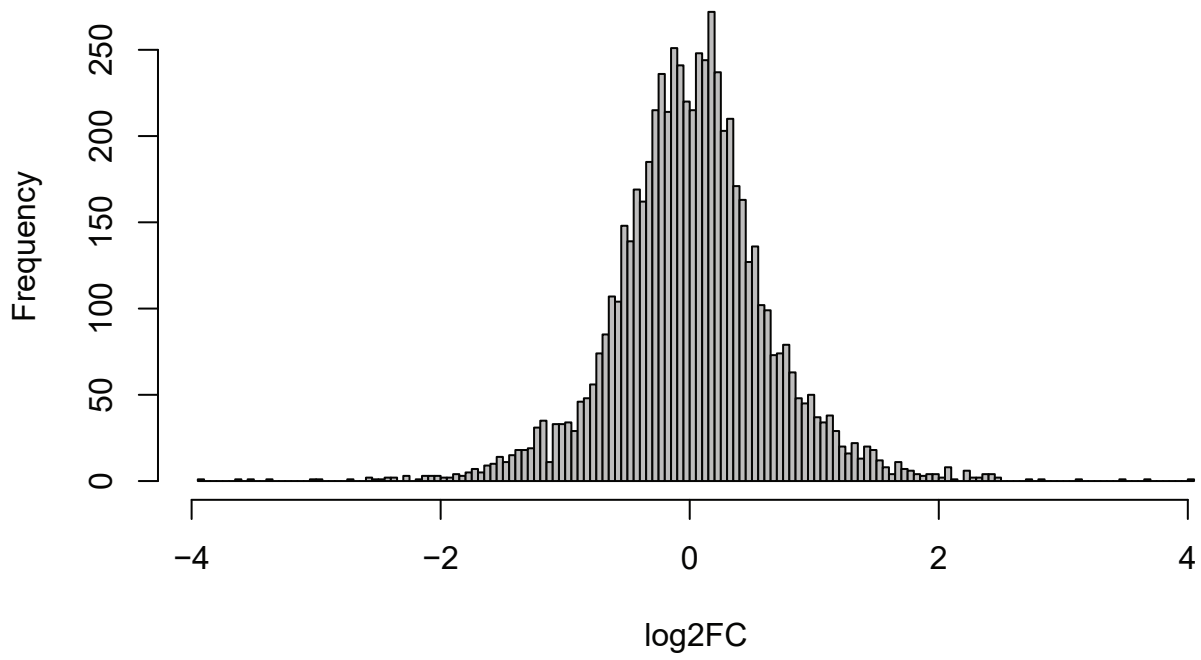

Supplement: NIHMS1624875-supplement-Supplementary_Figure_1.pdf [file NIHMS1624875-supplement-Supplementary_Figure_1.pdf]
